# Supplementary material for: Constructing oxygen vacancies in anatase TiO2: enhancing acetylene semi-hydrogenation performance through H2 heterolytic cleavage
Source: Royal Society of Chemistry journal article supplement (doi:10.1039/d4ta07290a), 2025-01-01
Supplement: d4ta07290a1.pdf [file d4ta07290a1.pdf]

# Supplementary Information

## Constructing Oxygen Vacancies in Anatase TiO<sub>2</sub>: Enhancing Acetylene Semi-Hydrogenation Performance through H<sub>2</sub> Heterolytic Cleavage

Qianjun Zhang,<sup>‡a</sup> Chong Yao,<sup>‡a</sup> Fan Zhang,<sup>a</sup> Yicheng Chen,<sup>a</sup> Zile Li,<sup>a</sup> Yongkang Zhou,<sup>a</sup> Yingxue Qin,<sup>a</sup> Longyu Xu,<sup>a</sup> Feng Feng,<sup>a</sup> Jia Zhao,<sup>a</sup> Chunshan Lu,<sup>a</sup> Qunfeng Zhang,<sup>\*a</sup> Qingtao Wang<sup>\*a</sup> and Xiaonian Li<sup>\*a</sup>

<sup>a</sup> Industrial Catalysis Institute of Zhejiang University of Technology, State Key Laboratory Breeding Base of Green Chemistry-Synthesis Technology, Hangzhou, 310014, P. R. China

<sup>‡</sup> These authors contributed equally to this work.

\*Corresponding author: Prof. Qunfeng Zhang (zhangqf@zjut.edu.cn), Prof. Qingtao Wang (qtwang@zjut.edu.cn), Prof. Xiaonian Li (xnli@zjut.edu.cn).

## 1. Computer details

All the models for the hydrogenation of acetylene to ethylene are carried out within the framework of the Perdew-Burke-Ernzerhof (PBE) method of generalized gradient approximation (GGA) in the Vienna ab initio simulation program (VASP)<sup>1, 2</sup>. Spin polarization is considered throughout the calculations. A  $1 \times 1 \times 1$  Monkhorst-Pack k-point mesh was used. The vacuum layer was set to 15 Å to avoid interactions between neighboring surfaces. Van der Waals force interactions between molecules are considered. Differential charge data are processed using VESTA software<sup>3</sup>

## 2. Calculation of reaction rate and apparent activation energy

The acetylene reaction rate ( $r$ ,  $\text{mol}\cdot\text{s}^{-1}\cdot\text{g}_{\text{cat}}^{-1}$ ) was calculated according to the following equations:

$$r = \frac{X \times F}{m}$$

where  $X$  = Acetylene conversion, %

$F$  = Acetylene molar flow rate,  $\text{mol}\cdot\text{s}^{-1}$

$m$  = weight of catalysts, g

The ethylene production rate ( $r_{C_2H_4}$ ,  $\text{mol}\cdot\text{s}^{-1}\cdot\text{g}_{\text{cat}}^{-1}$ ) was calculated according to the following equations:

$$r_{C_2H_4} = r \times S_{C_2H_4}$$

where  $r$  = acetylene reaction rate,  $\text{mol}\cdot\text{s}^{-1}\cdot\text{g}_{\text{cat}}^{-1}$

$S_{C_2H_4}$  = Selectivity of ethylene, %

Carbon balance calculation :

$$\text{carbon blance} = \frac{2F_{out, C_2H_2} + 2F_{out, C_2H_4} + 2F_{out, C_2H_6} + 4F_{out, C_4}}{2(F_{in, C_2H_2} + F_{in, C_2H_4})} \times 100\%$$

Where  $F_{out, C_2H_2}$  = The rate of acetylene flow out after the reaction,  $\text{mol}\cdot\text{s}^{-1}$

$F_{out, C_2H_4}$  = The rate of ethylene flow out after the reaction,  $\text{mol}\cdot\text{s}^{-1}$

$F_{in, C_2H_4}$  = The rate of ethylene flow entering before the reaction,  $\text{mol}\cdot\text{s}^{-1}$

$F_{out, C_2H_6}$  = The rate of ethane flow out after the reaction,  $\text{mol}\cdot\text{s}^{-1}$

$F_{out, C_4}$  = The rate of  $C_4$  flow out after the reaction,  $\text{mol}\cdot\text{s}^{-1}$

$F_{in, C_2H_2}$  = The rate of acetylene flow entering before the reaction,  $\text{mol}\cdot\text{s}^{-1}$

The apparent activation energy ( $E_a$ ) was calculated using the Arrhenius formula under toluene conversion below 15%:

$$\ln r = -\frac{E_a}{RT} + \ln A$$

where  $R$  = ideal gas constant,  $8.314 \text{ J}\cdot\text{mol}^{-1}\cdot\text{K}^{-1}$

$r$  = reaction rate of acetylene,  $\text{mol}\cdot\text{s}^{-1}\cdot\text{g}_{\text{cat}}^{-1}$

$T$  = reaction temperature, K

$\ln A$  = a constant

Finally,  $E_a$  was obtained by using the slope of the linear plot of  $1000/T$  versus  $\ln r$ .

### 3. Internal and external mass transfer limitations

#### 3.1 Internal Diffusion

To ensure the reaction rates fall within the intrinsic kinetic regime, it is necessary to eliminate the effects of both external and internal diffusion. Given that  $\text{TiO}_2$  catalysts treated under different atmospheres exhibit varying specific surface areas (see Table S1), we conducted experiments to eliminate internal and external diffusion for T-600, T-200, T-H200, and T-H600, which have different  $\text{O}_V$  contents. In a fixed-bed reactor, the elimination of external mass transfer effects is typically achieved by varying the linear flow velocity while maintaining a constant space velocity. Specifically, this involves simultaneously increasing the flow rate and the catalyst mass to test the reaction rate. When the reaction rate remains unchanged despite changes in the flow rate, the influence of external mass transfer can be considered negligible.<sup>4</sup> Therefore, we investigated the influence of external mass transfer on T-H200, T-H600, T-200, and T-600 under the conditions of a space velocity of  $54,000 \text{ h}^{-1}$ ,  $\text{H}_2 : \text{C}_2\text{H}_2 = 10:1$ , a reaction temperature of  $250^\circ\text{C}$ , and a reaction pressure of  $101 \text{ kPa}$ . After stabilizing the catalysts for 2 hours, kinetic data were collected three times for each flow rate and each catalyst, with the average values reported. The experimental results are shown in **Fig. S1a**.

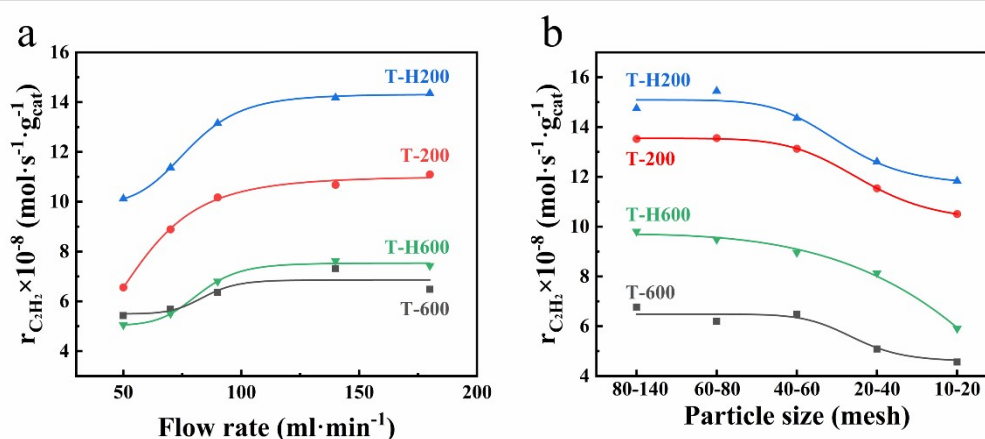

**Fig. S1.** (a) The effect of different feed flow rates and (b) The effect of different particle sizes on the acetylene reaction rate over  $\text{TiO}_2$  catalysts with varying  $\text{O}_V$  content was investigated under constant space velocity (reaction conditions:  $T = 250^\circ\text{C}$ ,  $\text{Sv} = 54000 \text{ h}^{-1}$ ,  $\text{H}_2 : \text{C}_2\text{H}_2 = 10:1$ ,  $P = 101 \text{ kPa}$ ).

**Fig. S1** shows that as the feed flow rate increases from  $50$  to  $90 \text{ mL} \cdot \text{min}^{-1}$ , the reaction rate for all  $\text{TiO}_2$  catalysts with different  $\text{O}_V$  contents increases significantly, indicating a substantial impact of external diffusion. However, when the flow rate exceeds  $90 \text{ mL} \cdot \text{min}^{-1}$ , the reaction rate increases slowly and stabilizes, demonstrating that external mass transfer limitations can be eliminated at flow rates above  $90 \text{ mL} \cdot \text{min}^{-1}$ . Therefore, to ensure accuracy, a flow rate of  $140 \text{ mL} \cdot \text{min}^{-1}$  was chosen for the subsequent kinetic experiments.

When the diffusion rate of the reactant gases within the catalyst's pore structure is sufficiently slow, internal diffusion becomes the rate-limiting step in the catalytic reaction. In this case, the catalyst's performance does not reflect its intrinsic catalytic

activity. The macroscopic reaction rate inferred from the results is also a composite of the internal diffusion rate and the reaction rate. Therefore, the impact of internal mass transfer on the study of intrinsic catalyst kinetics cannot be overlooked. In heterogeneous catalysis, internal mass transfer effects are typically investigated by varying the catalyst particle size.<sup>4,5</sup> When the reaction rate shows minimal dependence on particle size, it indicates that internal mass transfer effects can be considered negligible. To eliminate the influence of internal diffusion, we conducted experiments under the following conditions: a feed gas flow rate of 140 mL·min<sup>-1</sup>, space velocity of 54,000 h<sup>-1</sup>, H<sub>2</sub>: C<sub>2</sub>H<sub>2</sub> = 10:1, a reaction temperature of 250 °C, and a reaction pressure of 101 kPa. We evaluated the impact of internal mass transfer using five different particle sizes (80-140, 60-80, 40-60, 20-40, and 10-20 mesh) for the catalysts T-600, T-200, T-H200, and T-H600. After stabilizing the catalyst for 2 hours, we collected three sets of kinetic data for each particle size and catalyst. The experimental results are presented in **Fig. S1b**. as we can see, the reaction rate for TiO<sub>2</sub> catalysts with varying O<sub>V</sub> content increases as the catalyst particle size decreases. Specifically, when the catalyst particle size decreases from 10-20 mesh to 40-60 mesh, the reaction rate significantly increases. However, further reduction in particle size to 80-140 mesh results in minimal change in the reaction rate, indicating that internal mass transfer limitations can be neglected when the particle size is below 40-60 mesh. Therefore, using 40-60 mesh particles is sufficient for intrinsic kinetic testing. Additionally, the experiments to eliminate internal and external diffusion effects indicate that the T-H200 catalyst, with an optimal amount of O<sub>V</sub>, exhibits the highest reaction rate within the kinetic regime, consistent with our findings under optimal reaction conditions.

### 3.2 External Diffusion

When considering heat transfer effects, resistance caused by interphase heat transfer can be excluded according to the Mears criterion<sup>6</sup>, in which the presence of the interphase heat transfer can be ruled out if the calculated is smaller than 0.15.

$$C_M = \left| \frac{-\Delta H r_{obs} \rho_b R E}{h T^2 R_g} \right|$$

Where  $\Delta H$ = heat of reaction, kJ/mol

$r_{obs}$ = observed reaction rate, mol/(kg<sub>cat</sub>·s)

$\rho_b$  = bulk density of catalyst bed, kg/m<sup>3</sup>

$$= (1 - \Phi) \rho_c \quad (\Phi = \text{porosity})$$

R = catalyst particle radius, m

E= activation energy, kJ/mol

h= heat transfer coefficient between gas and pellet, kJ/(m<sup>2</sup>·s·K)

R<sub>g</sub>= gas constant, kJ/(mol·K)

T = reaction temperature, K

Before determining the heat transfer coefficient(h) for TiO<sub>2</sub>-catalyzed semi-hydrogenation of acetylene, the Nusselt number (Nu) and Prandtl number (Pr) for the

catalyst system are calculated with the available value of Reynolds number (Re) according to the following equations:

$$Nu = \frac{hd_p}{k_{t,mix}}$$

$$Pr = \frac{\mu_{mix}C_{p,mix}}{k_{t,mix}}$$

$$Nu = 2 + 0.6Re^{\frac{1}{2}}Pr^{\frac{1}{3}}$$

Where  $k_{t,mix}$  = thermal conductivity of blended reaction gases,  $\text{kJ}/\text{m}\cdot\text{s}\cdot\text{K}$ ,

$C_{p,mix}$  = specific heat of blended reaction gases  $\text{kJ}\cdot\text{kg}^{-1}\cdot\text{K}^{-1}$

$\mu_{mix}$  = dynamic viscosity of binary reaction gases,  $\text{kg}\cdot\text{m}^{-1}\cdot\text{s}^{-1}$

$dp$  = average diameter of the catalyst particle, m

For example, using T-H200, the parameters are determined as follows.

$$\Delta H = -175.7 \text{ kJ/mol}$$

$$r_{\text{obs}} = 1.4 \times 10^{-4} \text{ mol}/(\text{kg}_{\text{cat}}\cdot\text{s})$$

$$\rho_b = 874.73 \text{ kg}/\text{m}^3$$

$$R = 1.5 \times 10^{-4} \text{ m}$$

$$h = 0.65 \text{ kJ}/(\text{m}^2\cdot\text{s}\cdot\text{K})$$

$$T = 523.15 \text{ K}$$

$$R_g = 8.314 \times 10^{-3} \text{ kJ}/(\text{mol}\cdot\text{K})$$

$$E = 11.39 \text{ kJ/mol}$$

$$k_{t,mix} = 2.7932 \times 10^{-5} \text{ kJ}/(\text{m}\cdot\text{s}\cdot\text{K})$$

$$C_{p,mix} = 1.4220 \text{ kJ}/(\text{kg}\cdot\text{K})$$

$$dp = 3 \times 10^{-4} \text{ m}$$

These parameters are then substituted into the Mears equation.

$$C_M = \left| \frac{-\Delta H r_{\text{obs}} \rho_b R E}{h T^2 R_g} \right|$$

$$= [(176,7 \text{ kJ/mol}) \times (1.4 \times 10^{-4} \text{ mol}/(\text{kg}_{\text{cat}}\cdot\text{s})) \times (874.73 \text{ kg}/\text{m}^3) \times (1.5 \times 10^{-4} \text{ m}) \times 11.39 \text{ kJ/mol}] / [(0.65 \text{ kJ}/(\text{m}^2\cdot\text{s}\cdot\text{K})) \times (523.15 \text{ K})^2 \times 8.314 \times 10^{-3} \text{ kJ}/(\text{mol}\cdot\text{K})]$$

$$= 2.4855 \times 10^{-5} < 0.15$$

Since the determined value is much less than the critical value of 0.15, the resistance due to interphase heat transfer can be neglected under our reaction conditions.





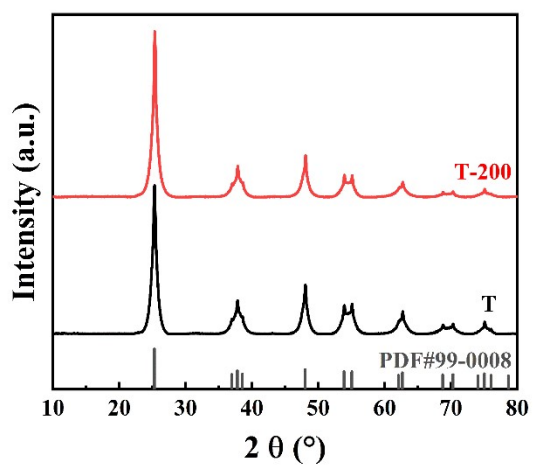

**Fig. S2.** XRD patterns of untreated commercial titanium dioxide (T) and T-200

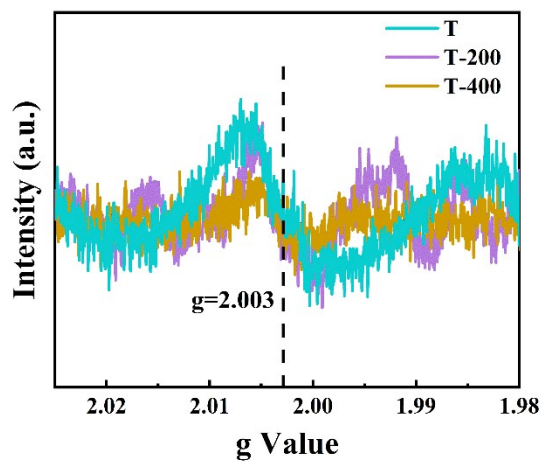

**Fig. S3.** EPR spectra of T, T-200, and T-400.

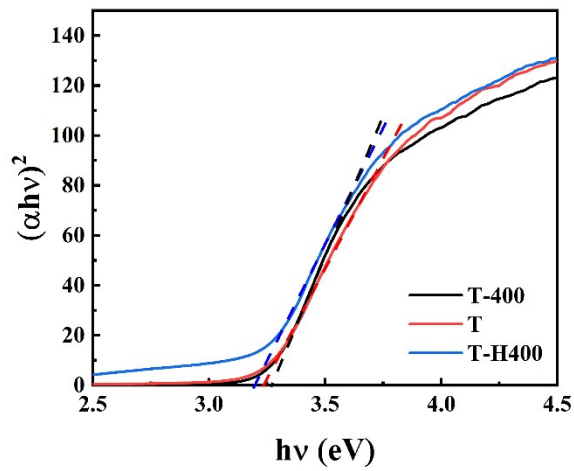

**Fig. S4.** The  $(\alpha h\nu)^2$  vs  $h\nu$  plots of T-400, T and T-H400, indicating the bandgap for the corresponding absorption spectrum of each sample. Bandgap energy is calculated from the extrapolated line (dashed) fitted to respective linear portions

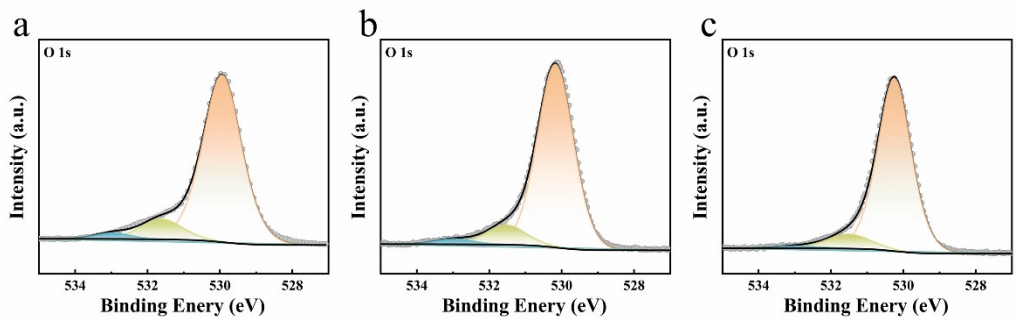

**Fig. S5.** The O 1s XPS spectra of (a) T-200, (b) T-400, (c) T-600.

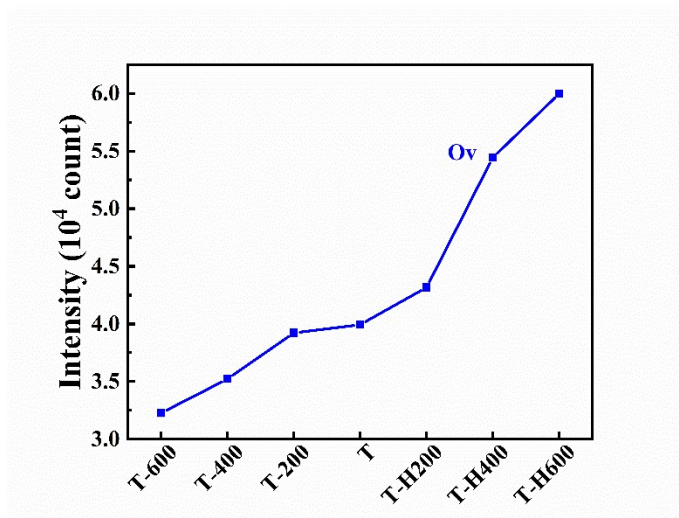

**Fig. S6.** Variation of the integrated intensity of the  $O_V$  peak with  $TiO_2$  catalysts treated under different atmospheres and temperatures.

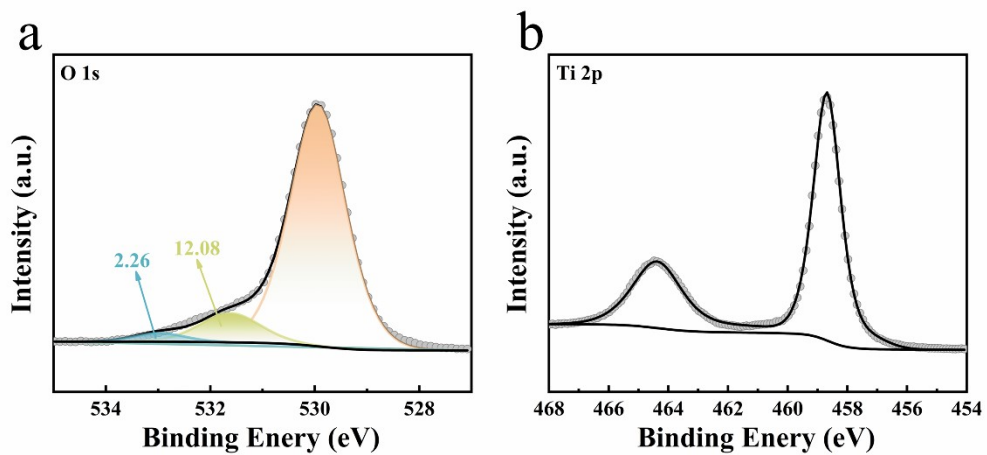

**Fig. S7.** The O 1s and Ti 2p XPS spectra of Pure TiO<sub>2</sub> without any treatment

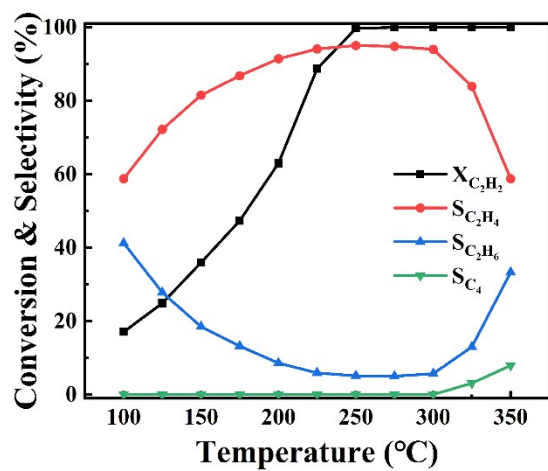

**Fig. S8.** Evaluation results of T-H200 at different temperatures (Reaction conditions: atmospheric pressure,  $H_2:C_2H_2=10:1$ ,  $GHSV=500h^{-1}$ )

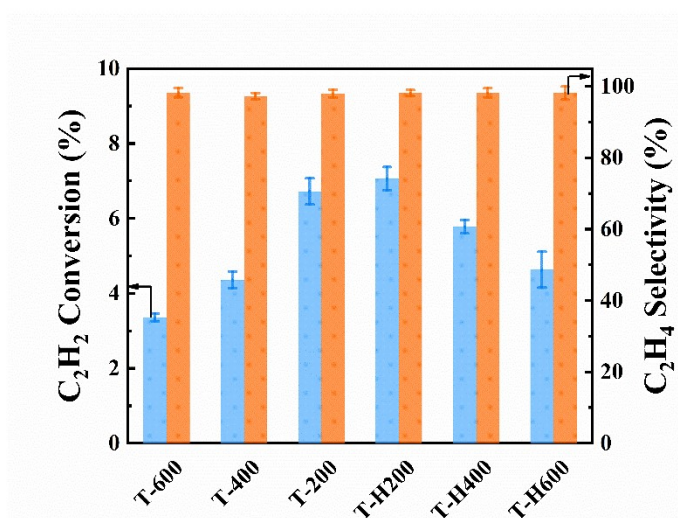

**Fig. S9.** At low conversion rates (<15%), the conversion and selectivity of different  $O_V$  content catalysts in the acetylene hydrogenation reaction were evaluated. (reaction conditions:  $T = 250^\circ\text{C}$ ,  $F=140 \text{ mL}\cdot\text{min}^{-1}$   $S_v = 54000 \text{ h}^{-1}$ ,  $H_2: C_2H_2 = 10: 1$ ,  $P = 101 \text{ kPa}$ ).



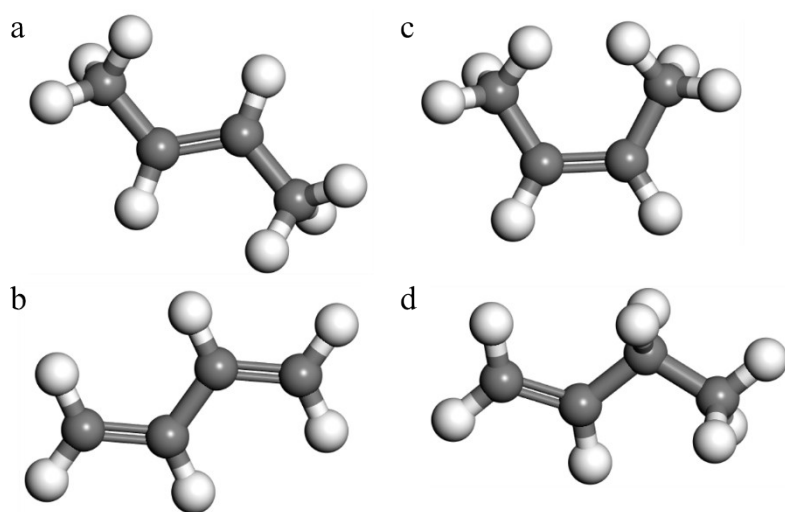

**Fig. S10.** The main components of C<sub>4</sub> are trans-2-Butene(a), cis-2-Butene(b), 1,3-Butadiene(c) and 1-Butylene(d).

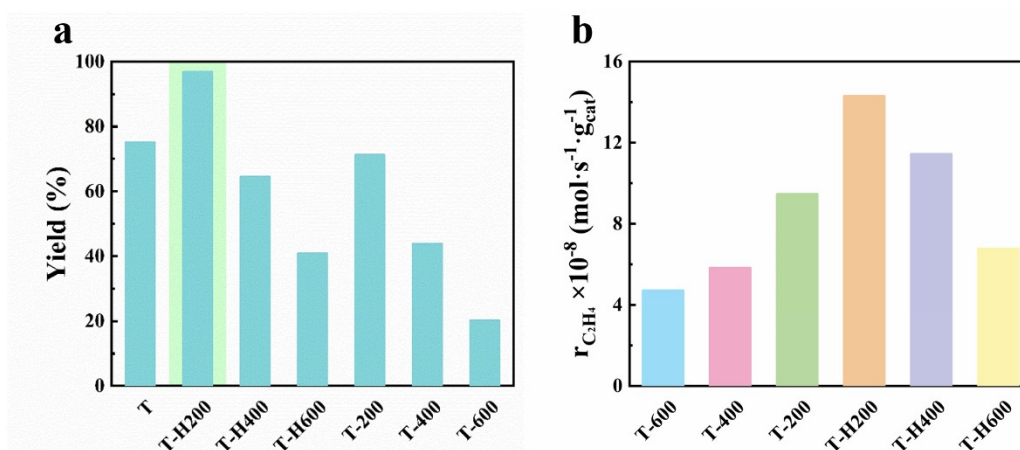

**Fig. S11:** (a) Yield of TiO<sub>2</sub> samples with different O<sub>V</sub> contents. T, T-H200, T-H400, T-H600, T-200, T-400, and T-600 were 75.08 %, 96.78 %, 64.47 %, 40.84 %, 71.13 %, 43.78 %, and 20.16 %, respectively, and T-H200, which has the highest O<sub>V</sub> content, has the highest yield. (b) Ethylene production rate of TiO<sub>2</sub> catalysts with varying O<sub>V</sub> content, determined at low conversion (<15%) to ensure the test is within the kinetic range. The O<sub>V</sub> contents of the TiO<sub>2</sub> catalysts follow the order T-600 < T-400 < T-H600 < T-200 < T-H400 < T-H200, corresponding to ethylene production rates of 4.71 × 10<sup>-8</sup>, 5.82 × 10<sup>-8</sup>, 6.76 × 10<sup>-8</sup>, 9.46 × 10<sup>-8</sup>, 11.44 × 10<sup>-8</sup>, and 14.29 × 10<sup>-8</sup> mol·s<sup>-1</sup>·g<sub>cat</sub><sup>-1</sup>, respectively. Similar with the acetylene reaction rate, the ethylene production rate is directly proportional to the O<sub>V</sub> content, reaching a maximum of 14.29 × 10<sup>-8</sup> mol·s<sup>-1</sup>·g<sub>cat</sub><sup>-1</sup> for the T-H200 sample.

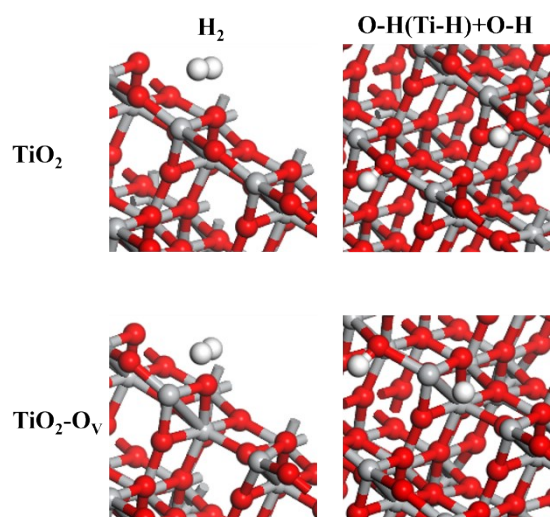

**Fig. S12:** The initial and transition states of hydrogen on  $\text{TiO}_2$  surfaces without  $\text{O}_v$  (homolytic cleavage) and with  $\text{O}_v$  (heterolytic cleavage). The red, white, grey and dark grey balls represent O, H, Ti and C atoms, respectively.

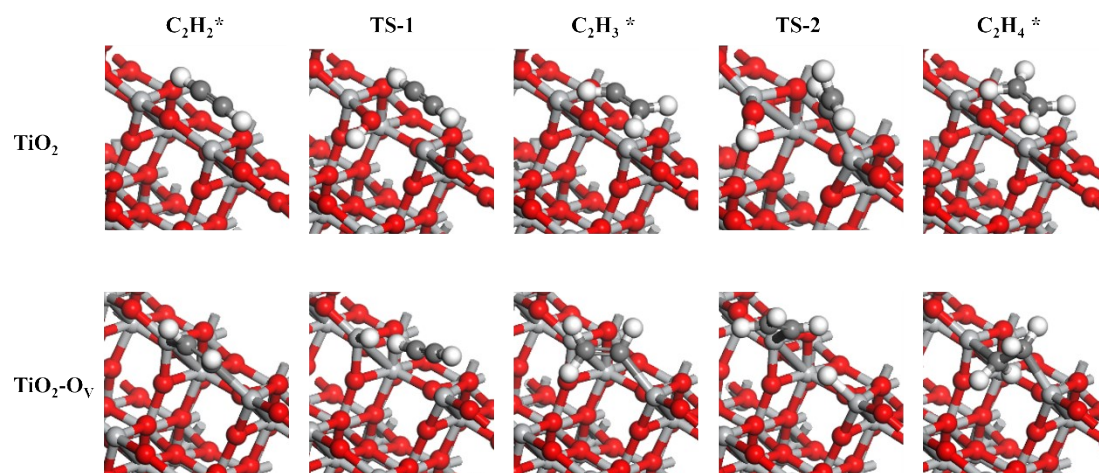

**Fig. S13:** The semi-hydrogenation process of acetylene between the  $TiO_2$  surface without  $O_V$  and the  $TiO_2$  surface with  $O_V$ . The red, white, grey and dark grey balls represent O, H, Ti and C atoms, respectively.

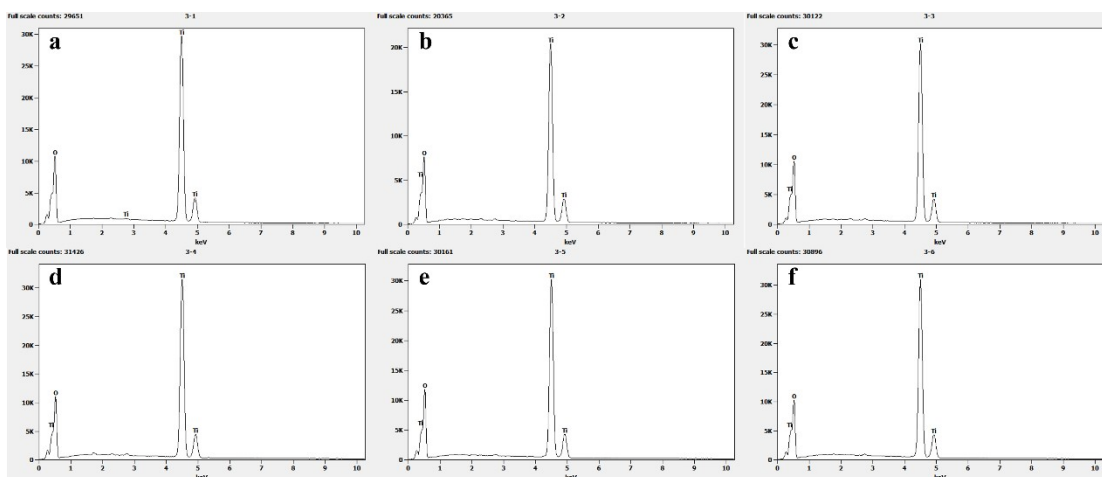

**Fig. S14:** Elemental analysis of different TiO<sub>2</sub> samples (a) T-200, (b) T-400, (c) T-600, (d) T-H200, (e) T-H400 and (f) T-H600.

**TiO<sub>2</sub>\_TS**

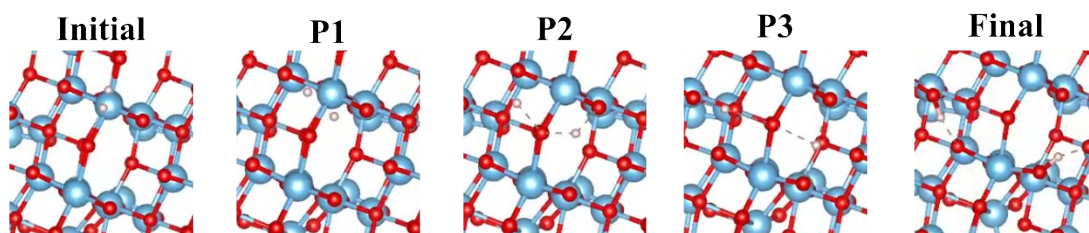

**TiO<sub>2</sub>-O<sub>v</sub>\_TS**

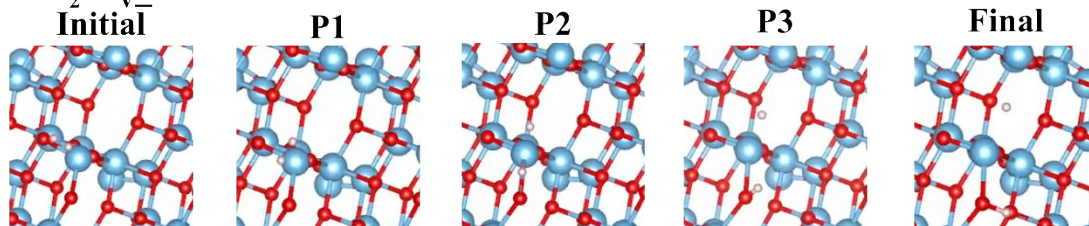

**Fig. S15:** The initial, transition and final states of H<sub>2</sub> dissociation on TiO<sub>2</sub> and TiO<sub>2</sub>-O<sub>v</sub> surfaces.

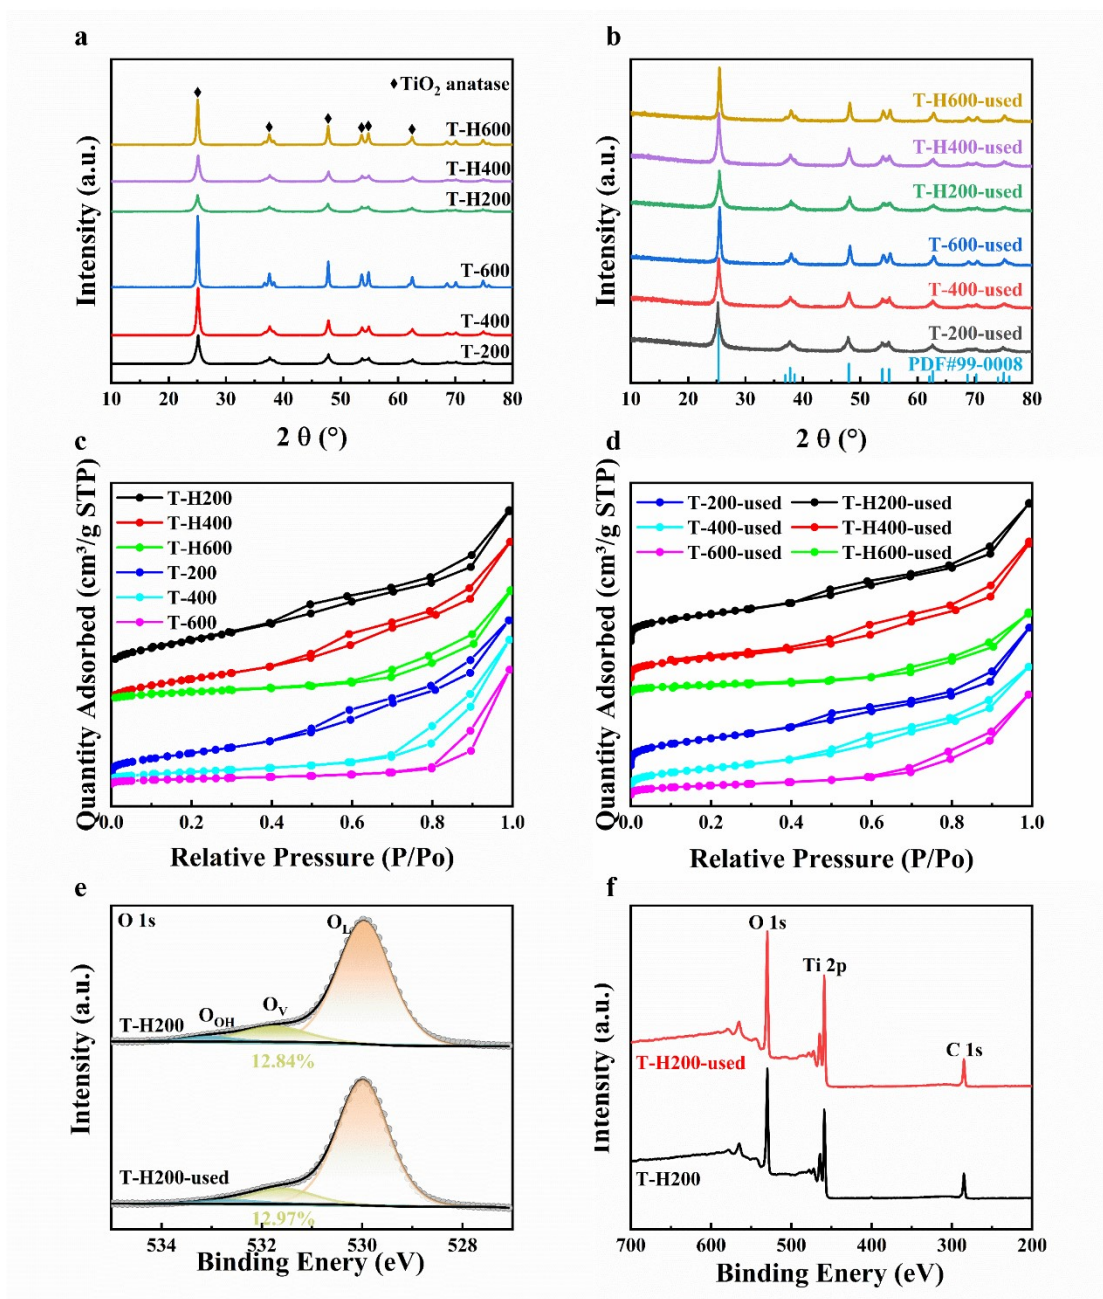

Figure S16: (a) XRD patterns of samples with varying OV content before the reaction and (b) after the reaction. (c) N<sub>2</sub> adsorption/desorption isotherms of samples with varying OV content before the reaction and (d) after the reaction. (e) The O 1s XPS spectra of T-H200 before and after the reaction, and (f) the full spectra of T-H200 before and after the reaction.

**Table S1.** Average crystallite size, BET surface area, proe volume and Proe diameter of TiO<sub>2</sub> Samples

| Catalysts | Avg. crystallite size <sup>a</sup> (nm) | BET surface area (m <sup>2</sup> /g) | Proe volume (cm <sup>3</sup> /g) | Proe diameter (nm) |
|-----------|-----------------------------------------|--------------------------------------|----------------------------------|--------------------|
| T-200     | 10.4                                    | 163.23                               | 0.34                             | 8.33               |
| T-400     | 15.2                                    | 70.55                                | 0.30                             | 17.02              |
| T-600     | 30.6                                    | 37.83                                | 0.24                             | 25.32              |
| T-H200    | 10.9                                    | 214.42                               | 0.35                             | 6.58               |
| T-H400    | 12.3                                    | 154.60                               | 0.34                             | 8.84               |
| T-H600    | 24.5                                    | 56.46                                | 0.23                             | 16.25              |

a. Calculated using the Scherrer equation



**Table S2.** The relative content of surface lattice oxygen ( $O_L$ ), oxygen anions near the oxygen vacancy sites ( $O_v$ ) and hydroxyl species of surface-adsorbed water molecules ( $O_{OH}$ ).

| Sample | O 1s      |           |              |
|--------|-----------|-----------|--------------|
|        | $O_L(\%)$ | $O_v(\%)$ | $O_{OH}(\%)$ |
| T      | 85.66     | 12.08     | 2.26         |
| T-200  | 85.93     | 11.91     | 2.16         |
| T-400  | 87.05     | 10.29     | 2.66         |
| T-600  | 88.21     | 9.10      | 2.68         |
| T-H200 | 84.22     | 12.84     | 2.94         |
| T-H400 | 82.49     | 15.05     | 2.47         |
| T-H600 | 79.99     | 16.70     | 3.22         |

**Table S3.** Reaction energies ( $\Delta E$ ) and energy barriers (Ea) of H<sub>2</sub> dissociation and C<sub>2</sub>H<sub>2</sub> hydrogenation.

|                                  | H <sub>2</sub> * $\rightarrow$ O-H (Ti-H)<br>+ O-H |      | C <sub>2</sub> H <sub>2</sub> * + OH (Ti-H)<br>$\rightarrow$ C <sub>2</sub> H <sub>3</sub> * |      | C <sub>2</sub> H <sub>3</sub> * + O-H $\rightarrow$<br>C <sub>2</sub> H <sub>4</sub> * |       |
|----------------------------------|----------------------------------------------------|------|----------------------------------------------------------------------------------------------|------|----------------------------------------------------------------------------------------|-------|
|                                  | $\Delta E$                                         | Ea   | $\Delta E$                                                                                   | Ea   | $\Delta E$                                                                             | Ea    |
| TiO <sub>2</sub>                 | 0.45                                               | 1.46 | 1.89                                                                                         | 2.90 | 4.9                                                                                    | 5.03  |
| TiO <sub>2</sub> -O <sub>v</sub> | -0.55                                              | 0.75 | -2.98                                                                                        | 0.14 | -3.13                                                                                  | -1.88 |

**Table S4:** Summarized results of publications in acetylene hydrogenation

| Catalyst                               | Composition <sup>a</sup><br>(vol%)<br>H <sub>2</sub> :<br>C <sub>2</sub> H <sub>2</sub> | Pressure<br>(MPa) | Temperature<br>(°C) | GH SV<br>(h <sup>-1</sup> ) | Durability<br>(h) | Conversion<br>(%) | Selectivity<br>(%) | reaction rates<br>(mol/g/h) | Ref.      |
|----------------------------------------|-----------------------------------------------------------------------------------------|-------------------|---------------------|-----------------------------|-------------------|-------------------|--------------------|-----------------------------|-----------|
| ceria<br>-V <sub>O</sub>               | 30: 1                                                                                   | 0.1               | 200                 | -                           | -                 | 3.0               | 12                 | -                           | 7         |
| ceria<br>-H                            | 30: 1                                                                                   | 0.1               | 200                 | -                           | -                 | 2.4               | 20                 | -                           |           |
| ceria<br>-O                            | 30: 1                                                                                   | 0.1               | 200                 | -                           | -                 | 7.1               | 76                 | -                           |           |
| TiO <sub>2</sub> -<br>H600             | -                                                                                       | -                 | 200                 | -                           | -                 | -                 | -                  | 2×10 <sup>-4</sup>          | 8         |
| TiO <sub>2</sub> -<br>fresh            | -                                                                                       | -                 | 200                 | -                           | -                 | -                 | -                  | 1.1×10 <sup>-4</sup>        |           |
| CeO <sub>2</sub><br>-<br>673K          | -                                                                                       | -                 | 150                 | -                           | -                 | 2.0               | 96.7               | -                           |           |
| CeO <sub>2</sub><br>-<br>533K          | -                                                                                       | -                 | 150                 | -                           | -                 | 1.7               | 94.7               | -                           |           |
| CeO <sub>2</sub><br>-H<br>623K         | -                                                                                       | -                 | 150                 | -                           | -                 | 1.7               | 94.4               | -                           | 9         |
| CeO <sub>2</sub><br>-H<br>673K         | -                                                                                       | -                 | 150                 | -                           | -                 | 2.7               | 92.4               | -                           |           |
| Pd/Ti<br>O <sub>2</sub> -<br>com-<br>A | 1.2: 1                                                                                  | -                 | 40                  | 540                         | -                 | 59                | 58                 | -                           | 10        |
| T-<br>H200                             | 10: 1                                                                                   | 0.1               | 250                 | 500                         | 23                | 100               | 95                 | 6.1×10 <sup>-4</sup>        | This work |

<sup>a</sup>: The composition refers to the hydrogen-to-acetylene ratio in the presence of excess ethylene.



Table S5: Characteristic Value and Uncertainty of High-Purity Air

| Component Name   | Standard Value (mol / mol) | Relative Expanded Uncertainty (k = 2) |
|------------------|----------------------------|---------------------------------------|
| High-Purity Air  | 99.999 %                   |                                       |
| O <sub>2</sub>   | 20 %~22 %                  |                                       |
| N <sub>2</sub>   | 78 %~80 %                  |                                       |
| H <sub>2</sub>   | ≤ 0.5 ppm                  | 1 %                                   |
| CH <sub>4</sub>  | ≤ 0.5 ppm                  |                                       |
| CO               | ≤ 0.5 ppm                  |                                       |
| CO <sub>2</sub>  | ≤ 0.5 ppm                  |                                       |
| H <sub>2</sub> O | ≤ 3 ppm                    |                                       |

Table S6: Elemental quantitative results of different TiO<sub>2</sub> samples

| Sample | Element | Weight (%) | Atom (%) |
|--------|---------|------------|----------|
| T-200  | O       | 33.08      | 59.68    |
|        | Ti      | 66.92      | 40.32    |
| T-400  | O       | 33.84      | 60.49    |
|        | Ti      | 66.16      | 39.51    |
| T-600  | O       | 33.75      | 60.40    |
|        | Ti      | 66.25      | 39.60    |
| T-H200 | O       | 32.37      | 58.89    |
|        | Ti      | 67.63      | 41.11    |
| T-H400 | O       | 34.60      | 61.30    |
|        | Ti      | 65.40      | 38.70    |
| T-H600 | O       | 31.72      | 58.18    |
|        | Ti      | 68.28      | 41.82    |

Table S7: The average grain size, BET surface area, pore volume, and pore diameter of the evaluated TiO<sub>2</sub> samples

| Catalysts   | Avg. crystallite size <sup>a</sup> (nm) | BET surface area (m <sup>2</sup> /g) | Pore volume (cm <sup>3</sup> /g) | Pore diameter (nm) |
|-------------|-----------------------------------------|--------------------------------------|----------------------------------|--------------------|
| T-200-used  | 11.1                                    | 148.34                               | 0.32                             | 6.64               |
| T-400-used  | 16.4                                    | 64.80                                | 0.29                             | 7.59               |
| T-600-used  | 31.1                                    | 40.36                                | 0.24                             | 12.35              |
| T-H200-used | 11.1                                    | 166.96                               | 0.32                             | 6.71               |
| T-H400-used | 15.1                                    | 125.74                               | 0.31                             | 8.52               |
| T-H600-used | 26.4                                    | 54.51                                | 0.19                             | 11.82              |

a. Calculated using the Scherrer equation

## reference

- 1 G. Kresse and J. Furthmüller, *Computational Materials Science*, 1996, **6**, 15-50.
- 2 G. Kresse and J. Hafner, *Physical Review B*, 1994, **49**, 14251-14269.
- 3 K. Momma and F. Izumi, *J. Appl. Crystallogr.*, 2011, **44**, 1272-1276.
- 4 Z. Bao, Y. Lu and F. Yu, *AIChE J.*, 2017, **63**, 2019-2029.
- 5 V. A. Tsipouriari and X. E. Verykios, *Catal. Today*, 2001, **64**, 83-90.
- 6 D. E. Mears, *Industrial & Engineering Chemistry Process Design and Development*, 1971, **10**, 541-547.
- 7 Z. Li, L. Chen, Z. Wu, A. Jia, S. Shi, H. Zhang, J. Wang, Z. Liu, W.-P. Shao, F. Yang, X.-P. Wu, X.-Q. Gong and W. Huang, *ACS Catalysis*, 2023, **13**, 5213-5224.
- 8 Q. Wan, Y. Chen, S. Zhou, J. Lin and S. Lin, *J. Mater. Chem. A*, 2021, **9**, 14064-14073.
- 9 J. Moon, Y. Cheng, L. L. Daemen, M. Li, F. Polo-Garzon, A. J. Ramirez-Cuesta and Z. Wu, *ACS Catalysis*, 2020, **10**, 5278-5287.
- 10 J. Panpranot, K. Kontapakdee and P. Praserttham, *Applied Catalysis A: General*, 2006, **314**, 128-133.
